# Supplementary material
Source: Springer Nature journal article supplement (https://www.springermedizin.de/resource/supplementary/12891_2001_14_MOESM4_ESM.pdf/9510336)
Supplement: MOESM4 [file 9510336]

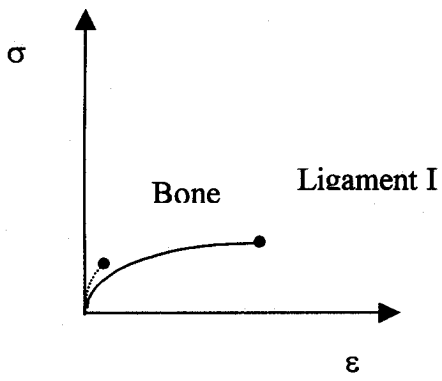

Mode I. Avulsion > Ligament tearing

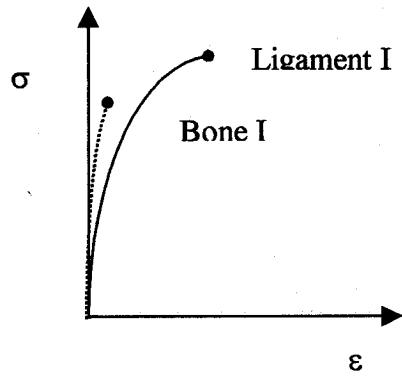

Mode I. Avulsion > Ligament tearing

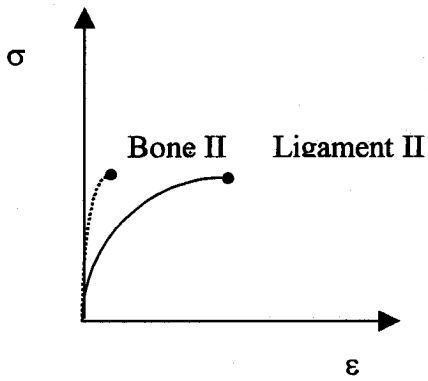

Mode II. Avulsion  $\approx$  Ligament tearing

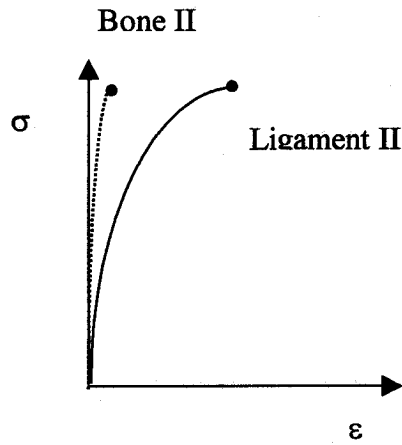

Mode II. Avulsion  $\approx$  Ligament tearing

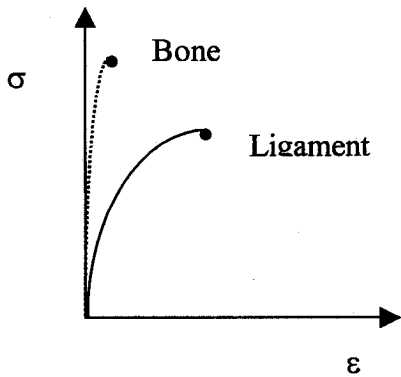

Mode III. Avulsion < Ligament tearing
